# Supplementary material
Source: PubMed Central journal article supplement (PMC9563008)
Supplement: NIHMS1731605-supplement-Supplemental_Material_2.pdf [file NIHMS1731605-supplement-Supplemental_Material_2.pdf]

## Online Supplement Results

The final cross-sectional correlational model presented below exhibited acceptable fit on most model-fit indices,  $\chi^2 (df = 27) = 158.63; p < .05; CFI = .90; WRMR = .89; RMSEA = .08$ .

Significant paths that remain unchanged from the final model presented in the text are indicated with dashed lines. Significant paths that were not included in the model in the text are indicated with solid lines.
