# Supplementary material
Source: PubMed Central journal article supplement (PMC9563008)

Online Supplement Figure

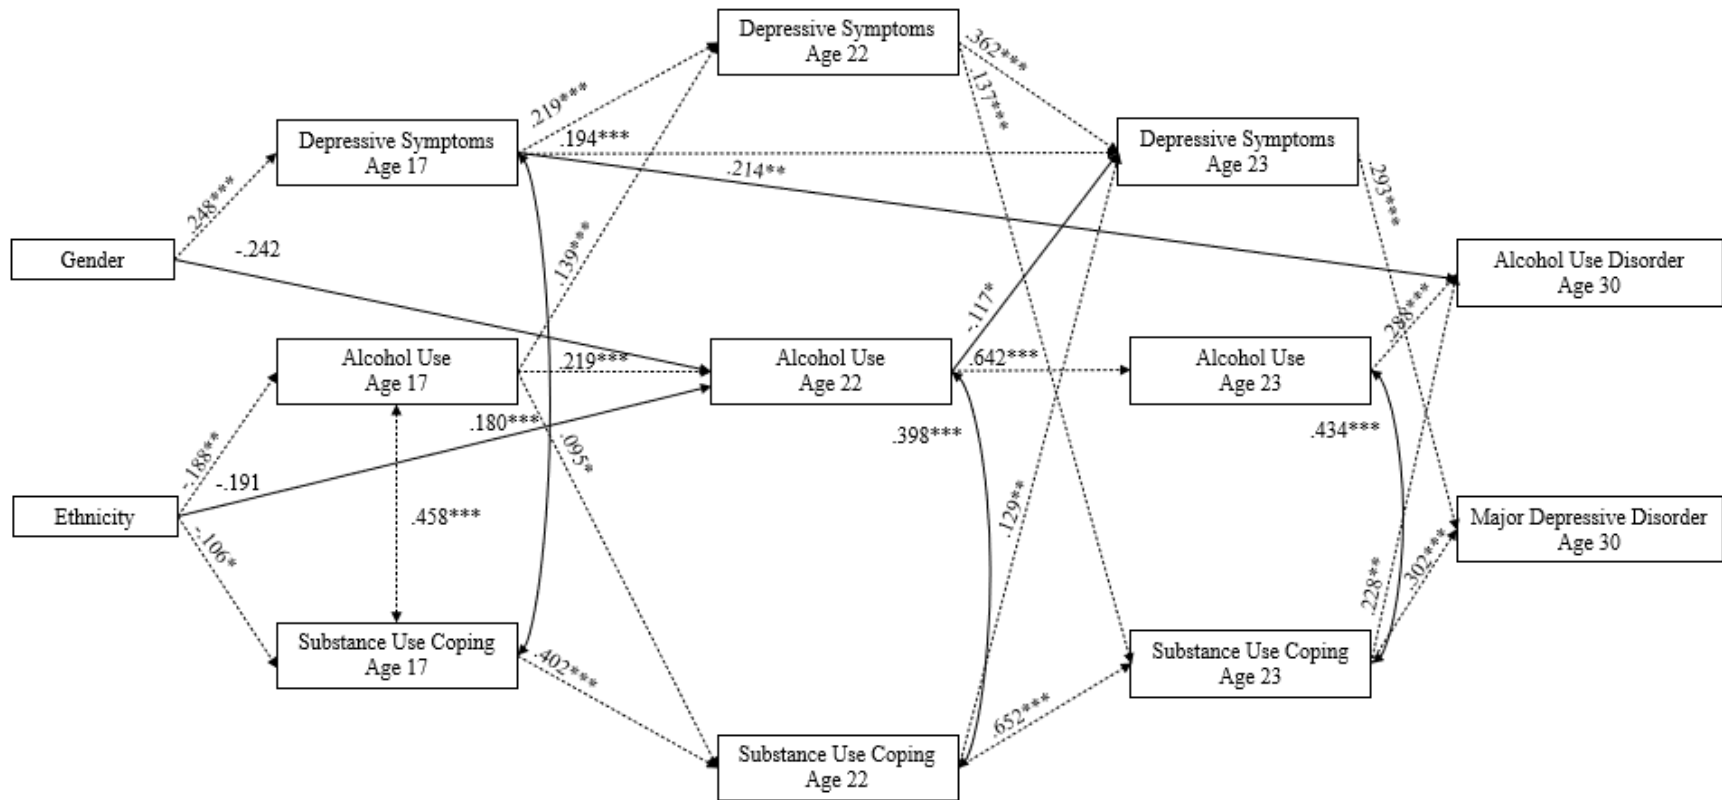

Supplement: NIHMS1731605-supplement-Supplemental_Material_1.pdf [file NIHMS1731605-supplement-Supplemental_Material_1.pdf]
